# Supplementary material
Source: MDPI journal article supplement (https://www.mdpi.com/2077-0472/12/5/672)
Supplement: s1 [file s1 › agriculture-1667015-Supplementary.pdf]

# **Supplementary Materials of**

## **RZWQM2 simulated drip fertigation managements to improve water and nitrogen use efficiency of maize in a solar greenhouse**

**Haomiao Cheng <sup>1,2,\*</sup>, Qilin Yu <sup>1</sup>, Mohmed A. M. Abdalhi <sup>3</sup>, Fan Li <sup>2</sup>, Zhiming Qi <sup>4</sup>,  
Tengyi Zhu <sup>1</sup>, Wei Cai <sup>1</sup>, Xiaoping Chen <sup>2</sup>, Shaoyuan Feng <sup>2</sup>**

<sup>1</sup> School of Environmental Science and Engineering, Yangzhou University, Yangzhou, 225127, China

<sup>2</sup> School of Hydraulic Science and Engineering, Yangzhou University, Yangzhou, 225127, China

<sup>3</sup> Department of Agricultural Engineering, Faculty of Agricultural Technology and Fish Sciences, Al-Neelain University, Khartoum 12702, Sudan

<sup>4</sup> Department of Bioresource Engineering, McGill University, Sainte-Anne-de-Bellevue, QC H9X 3V9, Canada

\* Corresponding author: Haomiao Cheng

Tel: +8617715120292 (H.C)

Email: yzchhm@yzu.edu.cn

**This file includes:**

- 1. Table S1**
- 2. Figure S1**
- 3. Figure S2**

**Table S1.** The soil physicochemical properties at the field experiment site

| Soil type | pH  | OM (%) | EC (dS m <sup>-1</sup> ) | Nutrients                |                          |                          | FC (%) | PWP (%) |
|-----------|-----|--------|--------------------------|--------------------------|--------------------------|--------------------------|--------|---------|
|           |     |        |                          | N (mg kg <sup>-1</sup> ) | P (mg kg <sup>-1</sup> ) | K (mg kg <sup>-1</sup> ) |        |         |
| Sand loam | 7.1 | 1.88   | 0.26                     | 108                      | 40.5                     | 82                       | 18     | 8       |

OM, organic matter; EC, electrical conductivity; N, nitrogen; P, phosphorus; K, potassium; FC, field capacity; PWP, permanent wilting point.

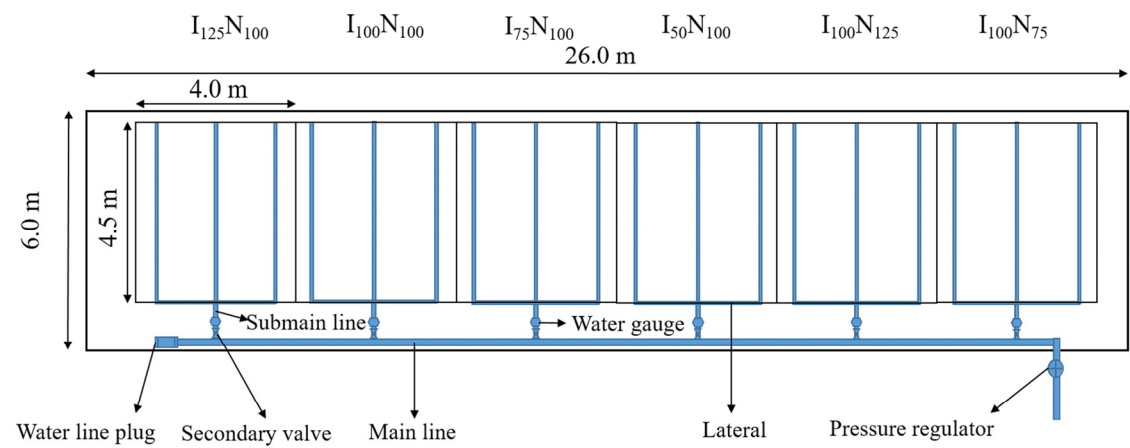

**Figure S1** Surface drip fertigation (SDF) system layout and experimental design in the solar greenhouse

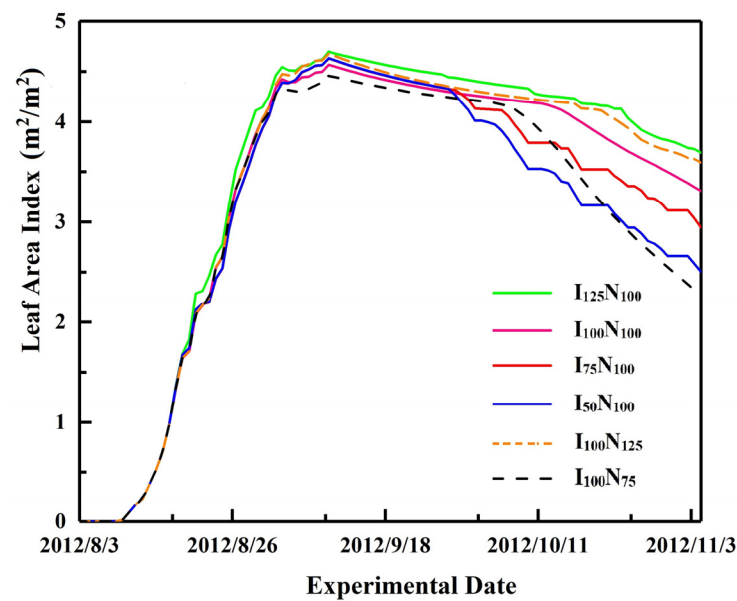

**Figure S2** The simulated leaf area index (LAI) in the surface drip fertigation (SDF) scenarios
